# Supplementary material for: Food Polyphenols Fail to Cause a Biologically Relevant Reduction of COX-2 Activity
Source: PLoS One. 2015 Oct 6;10(10):e0139147. doi: 10.1371/journal.pone.0139147 (PMC4594923; doi:10.1371/journal.pone.0139147)
Supplement: S1 Table — Shown are the analytes with their mass transitions for quantification in the scheduled SRM mode, electronic MS parameters (declustering potential (DP), collision energy (CE), collision exit potential (CXP)), retention time and the calibration range (lower limit of quantification (LLOQ), upper limit of quantification (ULOQ)). (DOCX) [file pone.0139147.s002.docx]

**Table S1:** Parameters of the LC-MS method used for the quantification of oxylipins in the *in vivo* model. Shown are the analytes with their mass transitions for quantification in the scheduled SRM mode, electronic MS parameters (declustering potential (DP), collision energy (CE), collision exit potential (CXP)), retention time and the calibration range (lower limit of quantification (LLOQ), upper limit of quantification (ULOQ)).

|  | **Mass transition** | | **MS parameter** | | | **Internal standard** | **retention time (min)** | **LLOQ * (nM)** | **ULOQ † (nM)** |
| --- | --- | --- | --- | --- | --- | --- | --- | --- | --- |
| **Analyte** | **m/z (Q1)** | **m/z (Q2)** | **DP (V)** | **CE (V)** | **CXP (V)** |
| 20-COOH-LTB4 | 365.2 | 347.2 | -80 | -25 | -8 | 2H4-TxB2 | 3.21 | 1.00 | 200 |
| 6-keto-PGF1α | 369.3 | 163.2 | -70 | -36 | -6 | 2H4-6-keto-PGF1a | 3.23 | 0.90 | 361 |
| Resolvin E1 | 349.3 | 195.0 | -65 | -22 | -10 | 2H4-TxB2 | 3.24 | 1.20 | 480 |
| 20-OH-LTB4 | 351.2 | 195.2 | -80 | -25 | -8 | 2H4-TxB2 | 3.36 | 0.25 | 200 |
| TxB3 | 367.3 | 169.3 | -70 | -34 | -8 | 2H4-TxB2 | 3.39 | 0.50 | 500 |
| TxB1 | 371.3 | 171.2 | -70 | -34 | -10 | 2H4-TxB2 | 3.76 | 0.50 | 500 |
| 8-i-PGF2α | 353.3 | 193.3 | -100 | -32 | -4 | 2H4-PGE2 | 3.92 | 0.10 | 500 |
| TXB2 | 369.2 | 169.1 | -60 | -25 | -7 | 2H4-TxB2 | 3.95 | 0.63 | 500 |
| PGE3 | 349.3 | 269.2 | -60 | -22 | -6 | 2H4-PGE2 | 4.01 | 0.30 | 120 |
| 11β-PGF2α | 353.3 | 193.1 | -30 | -36 | -12 | 2H4-PGE2 | 4.04 | 1.00 | 500 |
| 5-i-PGF2α | 353.3 | 115.1 | -60 | -38 | -11 | 2H4-PGE2 | 4.14 | 1.00 | 500 |
| PGD3 | 349.3 | 269.2 | -60 | -22 | -6 | 2H4-PGE2 | 4.22 | 1.00 | 200 |
| 9,12,13-TriHOME | 329.2 | 211.1 | -80 | -32 | -10 | 2H4-PGE2 | 4.29 | 1.25 | 1000 |
| PGF1α | 355.4 | 293.2 | -90 | -36 | -6 | 2H4-PGE2 | 4.36 | 0.10 | 500 |
| 9,10,13-TriHOME | 329.2 | 171.1 | -80 | -32 | -8 | 2H4-PGE2 | 4.37 | 0.50 | 400 |
| PGF2α | 353.2 | 309.2 | -80 | -26 | -7 | 2H4-PGE2 | 4.38 | 0.70 | 281 |
| PGE2 | 351.2 | 271.3 | -60 | -24 | -6 | 2H4-PGE2 | 4.57 | 0.10 | 200 |
| PGE1 | 353.3 | 317.2 | -60 | -20 | -6 | 2H4-PGE2 | 4.70 | 0.33 | 260 |
| PGD1 | 353.3 | 317.2 | -60 | -20 | -6 | 2H4-PGD2 | 4.81 | 0.50 | 200 |
| PGD2 | 351.2 | 271.3 | -60 | -24 | -6 | 2H4-PGD2 | 4.84 | 1.00 | 200 |
| 15-keto-PGF1α | 353.3 | 193.1 | -40 | -38 | -6 | 2H4-PGE2 | 4.87 | 0.25 | 500 |
| 11,12-,15-TriHETrE | 353.2 | 167.1 | -80 | -28 | -10 | 2H4-PGE2 | 5.23 | 1.00 | 100 |
| LXA4 | 351.2 | 115.2 | -60 | -21 | -8 | 2H4-PGE2 | 5.25 | 0.18 | 70 |
| RvD1 | 375.3 | 141 | -50 | -20 | -8 | 2H4-PGE2 | 5.25 | 0.10 | 100 |
| 13,14-dihydro-15-keto-PGF2α | 353.3 | 183.3 | -80 | -36 | -10 | 2H4-PGE2 | 5.44 | 0.10 | 500 |
| dihomo-PGF2α | 381.4 | 221.1 | -60 | -38 | -10 | 2H4-PGE2 | 5.74 | 0.25 | 500 |
| 13,14-dihydro-15-keto-PGE1 | 353.3 | 221.2 | -40 | -30 | -6 | 2H4-PGE2 | 5.79 | 0.10 | 500 |
| RvE2 | 333.2 | 253.3 | -60 | -20 | -9 | 2H4-PGE2 | 6.04 | 1.00 | 100 |
| PGJ2 | 333.3 | 189.2 | -60 | -25 | -8 | 2H4-PGE2 | 6.57 | 1.60 | 160 |
| LTB5 | 333.3 | 195.2 | -65 | -22 | -8 | 2H4-LTB4 | 6.60 | 0.25 | 200 |
| PGB2 | 333.3 | 175.1 | -60 | -28 | -8 | 2H4-PGE2 | 6.69 | 0.40 | 800 |
| THF diol | 353.2 | 127.1 | -80 | -32 | -8 | 2H4-LTB4 | 6.78 | 0.25 | 100 |
| 18(S)-RvE3 | 333.2 | 201.3 | -60 | -20 | -9 | 2H4-PGE2 | 7.11 | 0.50 | 100 |
| 12-OH-17(18)-EpETE | 333.1 | 179.3 | -65 | -20 | -6 | 2H4-9,10-DiHOME | 7.19 | 0.25 | 100 |
| bicyclo PGE2 | 333.3 | 113.2 | -90 | -36 | -4 | 2H4-PGE2 | 7.28 | 1.00 | 500 |
| 15,16-DiHODE | 311.2 | 223.2 | -80 | -29 | -10 | 2H4-9,10-DiHOME | 7.37 | 0.50 | 400 |
| 9,10-DiHODE | 311.2 | 201.2 | -65 | -27 | -10 | 2H4-9,10-DiHOME | 7.41 | 0.20 | 400 |
| 8,15-DiHETE | 335.2 | 235.2 | -65 | -22 | -4 | 2H11-14,15-DiHETrE | 7.43 | 0.80 | 80 |
| 12,13-DiHODE | 311.2 | 183.1 | -80 | -30 | -8 | 2H4-9,10-DiHOME | 7.48 | 2.00 | 400 |
| 18(R)-RvE3 | 333.2 | 201.3 | -60 | -20 | -9 | 2H4-PGE2 | 7.66 | 1.00 | 100 |
| 6-trans-LTB4 | 335.2 | 195.1 | -65 | -23 | -9 | 2H4-LTB4 | 7.78 | 0.50 | 200 |
| 5,15-DiHETE | 335.3 | 173.2 | -60 | -21 | -8 | 2H11-14,15-DiHETrE | 7.79 | 0.25 | 100 |
| 17,18-DiHETE | 335.3 | 247.2 | -65 | -24 | -8 | 2H11-14,15-DiHETrE | 7.92 | 0.25 | 100 |
| LTB4 | 335.2 | 195.1 | -65 | -23 | -9 | 2H4-LTB4 | 8.20 | 0.50 | 200 |
| 14,15-DiHETE | 335.3 | 207.2 | -65 | -25 | -10 | 2H11-14,15-DiHETrE | 8.44 | 0.25 | 100 |
| 11,12-DiHETE | 335.2 | 167.1 | -65 | -26 | -5 | 2H11-14,15-DiHETrE | 8.64 | 0.25 | 100 |
| 12,13-DiHOME | 313.2 | 183.2 | -80 | -30 | -8 | 2H4-9,10-DiHOME | 8.83 | 1.25 | 1000 |
| 8,9-DiHETE | 335.2 | 127.1 | -65 | -26 | -5 | 2H4-9,10-DiHOME | 9.00 | 0.50 | 100 |
| 9,10-DiHOME | 313.2 | 201.2 | -80 | -29 | -8 | 2H4-9,10-DiHOME | 9.26 | 0.50 | 1000 |
| 14,15-DiHETrE | 337.2 | 207.1 | -65 | -25 | -10 | 2H11-14,15-DiHETrE | 9.88 | 0.25 | 200 |
| 19,20-DiHDPE | 361.2 | 273.2 | -65 | -24 | -6 | 2H11-14,15-DiHETrE | 9.90 | 1.00 | 100 |
| LTB3 | 337.2 | 195.2 | -65 | -22 | -8 | 2H4-LTB4 | 10.14 | 0.50 | 200 |
| 9,10-Dihydroxystearic acid | 315.0 | 170.8 | -60 | -36 | -9 | 2H4-9,10-DiHOME | 10.41 | 2.00 | 500 |
| 16,17-DiHDPE | 361.2 | 233.2 | -65 | -24 | -6 | 2H11-14,15-DiHETrE | 10.48 | 0.50 | 100 |
| 11,12-DiHETrE | 337.2 | 167.1 | -65 | -26 | -8 | 2H11-14,15-DiHETrE | 10.64 | 0.25 | 200 |
| 13,14-DiHDPE | 361.2 | 193.2 | -65 | -24 | -6 | 2H11-14,15-DiHETrE | 10.73 | 0.25 | 100 |
| 20-HEPE | 317.2 | 287.3 | -50 | -20 | -8 | 2H8-12-HETE | 10.83 | 0.50 | 100 |
| 9-HOTrE | 293.2 | 171.2 | -65 | -22 | -8 | 2H4-9-HODE | 11.01 | 0.50 | 100 |
| 10,11-DiHDPE | 361.2 | 153.2 | -65 | -24 | -6 | 2H11-14,15-DiHETrE | 11.11 | 0.50 | 100 |
| 8,9-DiHETrE | 337.2 | 127.1 | -70 | -30 | -8 | 2H11-14,15-DiHETrE | 11.26 | 0.50 | 200 |
| EKODE | 309.2 | 291.1 | -65 | -20 | -6 | 2H4-9-HODE | 11.33 | 0.50 | 100 |
| 13-HOTrE | 293.2 | 195.1 | -70 | -24 | -8 | 2H4-9-HODE | 11.34 | 0.60 | 60 |
| 18-HEPE | 317.2 | 259.2 | -55 | -17 | -7 | 2H4-9-HODE | 11.40 | 0.10 | 100 |
| 5,6-DiHETE | 335.2 | 115.2 | -60 | -21 | -8 | 2H11-14,15-DiHETrE | 11.79 | 0.25 | 100 |
| 15-deoxy-PGJ2 | 315.2 | 271.2 | -65 | -20 | -6 | 2H11-14,15-DiHETrE | 11.84 | 1.00 | 400 |
| 7,8-DiHDPE | 361.2 | 113.1 | -65 | -24 | -6 | 2H11-14,15-DiHETrE | 11.91 | 1.00 | 100 |
| 15-HEPE | 317.2 | 219.2 | -60 | -20 | -10 | 2H8-12-HETE | 12.08 | 1.25 | 500 |
| 20-HETE | 319.2 | 275.1 | -80 | -23 | -6 | 2H6-20-HETE | 12.10 | 2.60 | 260 |
| 5,6-DiHETrE | 337.2 | 145.1 | -70 | -26 | -10 | 2H11-14,15-DiHETrE | 12.17 | 0.50 | 200 |
| 8-HEPE | 317.2 | 155.2 | -60 | -20 | -8 | 2H8-12-HETE | 12.42 | 0.63 | 500 |
| 12-HEPE | 317.2 | 179.2 | -65 | -20 | -8 | 2H8-12-HETE | 12.59 | 0.63 | 500 |
| 5-HEPE | 317.2 | 115.1 | -60 | -20 | -6 | 2H8-12-HETE | 13.12 | 0.50 | 400 |
| 4,5-DiHDPE | 361.2 | 229.3 | -65 | -24 | -6 | 2H11-14,15-DiHETrE | 13.13 | 2.00 | 100 |
| 13-HODE | 295.2 | 195.2 | -80 | -26 | -9 | 2H4-9-HODE | 13.33 | 1.00 | 2000 |
| 9-HODE | 295.2 | 171.1 | -80 | -26 | -7 | 2H4-9-HODE | 13.44 | 1.00 | 2000 |
| 20-HDHA | 343.2 | 241.1 | -55 | -19 | -7 | 2H8-12-HETE | 13.72 | 0.25 | 20 |
| 15(16)-EpODE | 293.3 | 235.2 | -65 | -20 | -4 | 2H4-9(10)-EpOME | 13.96 | 0.25 | 100 |
| 15-HETE | 319.2 | 219.2 | -60 | -20 | -8 | 2H8-12-HETE | 14.02 | 1.25 | 1000 |
| 9(10)-EpODE | 293.3 | 171.2 | -65 | -20 | -8 | 2H4-9(10)-EpOME | 14.11 | 0.20 | 80 |
| 17(18)-EpETE | 317.2 | 215.2 | -65 | -20 | -6 | 2H11-14(15)-EpETrE | 14.15 | 0.50 | 100 |
| 16-HDHA | 343.2 | 233.2 | -55 | -19 | -7 | 2H8-12-HETE | 14.21 | 0.10 | 20 |
| 17-HDHA | 343.2 | 201.2 | -60 | -20 | -6 | 2H8-12-HETE | 14.33 | 0.50 | 100 |
| 13-HDHA | 343.2 | 193.1 | -55 | -19 | -7 | 2H8-12-HETE | 14.47 | 0.10 | 20 |
| 12(13)-EpODE | 293.2 | 183.1 | -65 | -24 | -8 | 2H4-9(10)-EpOME | 14.50 | 0.25 | 100 |
| 13-oxo-ODE | 293.2 | 195.1 | -75 | -20 | -8 | 2H4-9-HODE | 14.50 | 1.00 | 100 |
| 11-HETE | 319.2 | 167.2 | -60 | -23 | -7 | 2H8-12-HETE | 14.52 | 0.50 | 1000 |
| 10-HDHA | 343.2 | 153.2 | -45 | -21 | -7 | 2H8-12-HETE | 14.68 | 0.10 | 20 |
| 14-HDHA | 343.2 | 205.2 | -50 | -19 | -7 | 2H8-12-HETE | 14.68 | 0.25 | 500 |
| 15-oxo-ETE | 317.2 | 113.1 | -65 | -25 | -8 | 2H8-5-HETE | 14.70 | 0.50 | 100 |
| 9-oxo-ODE | 293.2 | 185.1 | -90 | -28 | -8 | 2H4-9-HODE | 14.73 | 1.00 | 100 |
| 14(15)-EpETE | 317.2 | 207.2 | -65 | -20 | -6 | 2H11-14(15)-EpETrE | 14.78 | 0.25 | 100 |
| 8-HETE | 319.2 | 155.2 | -60 | -22 | -6 | 2H8-12-HETE | 14.86 | 2.50 | 1000 |
| 12-HETE | 319.2 | 179.2 | -60 | -20 | -8 | 2H8-12-HETE | 14.88 | 0.50 | 1000 |
| 11(12)-EpETE | 317.2 | 167.2 | -65 | -20 | -6 | 2H11-14(15)-EpETrE | 14.91 | 0.50 | 100 |
| 11-HDHA | 343.2 | 121.1 | -45 | -20 | -7 | 2H8-5-HETE | 14.93 | 0.10 | 20 |
| 7-HDHA | 343.2 | 141.2 | -55 | -19 | -7 | 2H8-5-HETE | 15.06 | 0.25 | 500 |
| 8(9)-EpETE | 317.2 | 127.2 | -65 | -20 | -6 | 2H11-14(15)-EpETrE | 15.07 | 1.00 | 100 |
| 9-HETE | 319.2 | 167.2 | -60 | -23 | -7 | 2H8-5-HETE | 15.16 | 2.50 | 1000 |
| 15(S)-HETrE | 321.2 | 221.2 | -70 | -23 | -10 | 2H8-5-HETE | 15.19 | 0.50 | 200 |
| 8-HDHA | 343.2 | 189.2 | -50 | -19 | -7 | 2H8-5-HETE | 15.22 | 0.10 | 20 |
| 5-HETE | 319.2 | 115.2 | -60 | -21 | -7 | 2H8-5-HETE | 15.38 | 1.25 | 1000 |
| 4-HDHA | 343.2 | 101.1 | -55 | -19 | -7 | 2H8-5-HETE | 15.78 | 0.10 | 500 |
| 19(20)-EpDPE | 343.2 | 241.2 | -65 | -20 | -7 | 2H11-14(15)-EpETrE | 15.83 | 0.25 | 100 |
| 12(13)-EpOME | 295.3 | 195.2 | -80 | -23 | -8 | 2H4-9(10)-EpOME | 15.91 | 0.25 | 200 |
| 14(15)-EpETrE | 319.2 | 219.3 | -65 | -20 | -4 | 2H11-14(15)-EpETrE | 16.03 | 0.50 | 100 |
| 9(10)-EpOME | 295.3 | 171.1 | -80 | -23 | -8 | 2H4-9(10)-EpOME | 16.08 | 0.25 | 200 |
| 16(17)-EpDPE | 343.2 | 233.2 | -65 | -20 | -7 | 2H11-14(15)-EpETrE | 16.20 | 0.25 | 100 |
| 13(14)-EpDPE | 343.2 | 193.2 | -65 | -20 | -7 | 2H11-14(15)-EpETrE | 16.28 | 0.50 | 100 |
| 5-oxo-ETE | 317.2 | 273.2 | -65 | -22 | -6 | 2H4-9(10)-EpOME | 16.36 | 2.00 | 100 |
| 10(11)-EpDPE | 343.2 | 153.2 | -65 | -20 | -7 | 2H11-14(15)-EpETrE | 16.36 | 0.25 | 100 |
| 11(12)-EpETrE | 319.3 | 167.2 | -60 | -20 | -7 | 2H11-14(15)-EpETrE | 16.48 | 0.50 | 200 |
| 8(9)-EpETrE | 319.2 | 155.2 | -65 | -20 | -6 | 2H11-14(15)-EpETrE | 16.63 | 2.00 | 100 |
| 5(6)-EpETrE | 319.2 | 191.1 | -60 | -20 | -7 | 2H11-14(15)-EpETrE | 16.78 | 1.00 | 100 |
| 9(10)-Epoxystearic acid | 297.0 | 170.8 | -100 | -28 | -11 | 2H4-9(10)-EpOME | 17.25 | 1.00 | 100 |

* LLOQ was set to the lowest calibration standard injected yielding a signal to noise ratio ≥ 9 and an accuracy within ± 20%.

† ULOQ does not reflect the end of the linear range but the concentration of the highest calibrator.
